# Supplementary material for: Cellular-Host Interaction of SARS-CoV-2 Gamma Variant
Source: Preprints.org preprint supplement (doi:10.20944/preprints202307.0876.v1), 2023-07-13
Supplement: Supplementary file 1 [file supplementary]

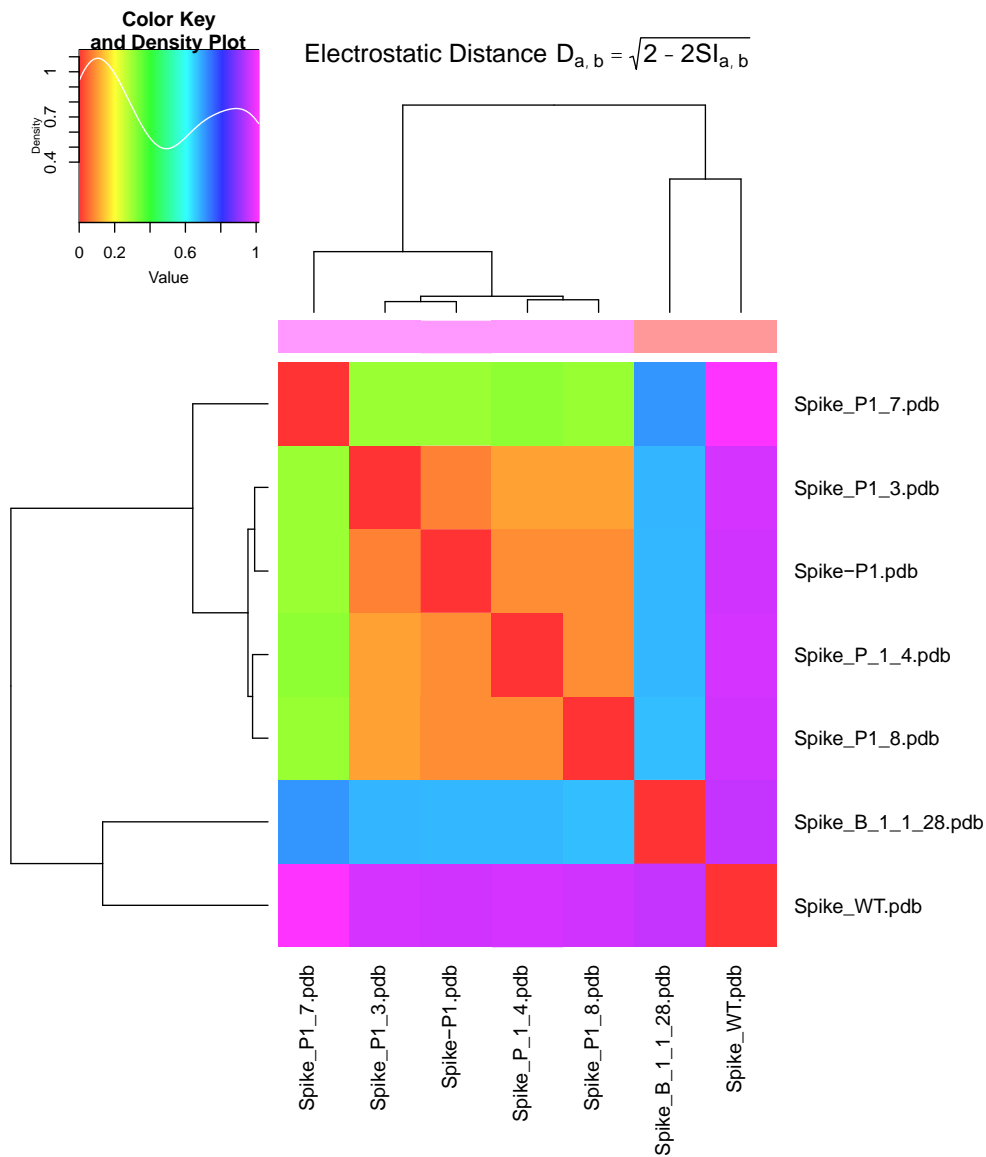

**Supplementary Figure 1:** Epogram result of webPIPSA analysis. Result of electrostatic potential analysis of the surfaces of the analyzed models and distances between the models evidenced in the matrix. The S glycoproteins of the Wt-Wuhan and B.1.1.28 variants are the ones with the greatest distances in relation to the others. P1 S protein models, and P.1.3 and P.1.8 and P1.4 have smaller distances between them. The P.1.7 S protein has a smaller distance in relation to the S protein of the Gamma variant than in relation to the ones from the ancestral lineage B.1.1.28 and WT-Wuhan (Wild-type).
